# Supplementary material for: Mitigation of Jahn–Teller distortion and Na+/vacancy ordering in a distorted manganese oxide cathode material by Li substitution
Source: PubMed Central journal article supplement — Chem Sci. 2020 Nov 12;12(3):1062–7. doi: 10.1039/d0sc05427e (PMC8179102; doi:10.1039/d0sc05427e), 2020-11-12
Supplement: SC-012-D0SC05427E-s001.pdf [file SC-012-D0SC05427E-s001.pdf]

## Electronic Supplementary Information

### **Mitigation of Jahn-Teller Distortion and Na<sup>+</sup>/Vacancy Ordering in P'2-Na<sub>0.67</sub>MnO<sub>2</sub> Cathode Material by Li Substitution**

Yanchen Liu, Chenchen Wang, Shuo Zhao, Lin Zhang, Kai Zhang, Fujun Li,\* and Jun Chen

Key Laboratory of Advanced Energy Materials Chemistry (Ministry of Education), College of Chemistry, Nankai University, Tianjin 300071, P.R.China

E-mail: fujunli@nankai.edu.cn

## Experimental Section

*Materials synthesis:* P'2-Na<sub>0.67</sub>Li<sub>x</sub>Mn<sub>1-x</sub>O<sub>2</sub> (x = 0, 0.03, 0.05 and 0.08) were prepared by a facile solid-state method. Stoichiometric Na<sub>2</sub>CO<sub>3</sub> (5 mol% excess), Li<sub>2</sub>CO<sub>3</sub> (5 mol% excess) and Mn<sub>2</sub>O<sub>3</sub> were ball milled with acetone at 400 rpm for 12 h. The mixtures were dried and pressed into pellets. The precursors were heated in air atmosphere at 1000 °C for 15 h, then quenched to room temperature, and transferred to an argon-filled glove box until use.

*Materials characterization:* The crystal structure of the materials was characterized with a X-ray diffractometer (Rigaku SmartLab) using Cu K $\alpha$  radiation. Rietveld refinement was carried out using general structure analysis system (GSAS-II). ICP-OES (SpectroBlue) was conducted to analyze the compositions of materials. Solid-state <sup>7</sup>Li NMR spectra were obtained on a JNM-ECZ600R widebore spectrometer. XPS measurements were performed on a Perkin Elmer PHI 1600 ESCA system. SEM (JEOL JSM-7500F) and TEM (FEI, Talos F200X G2, AEMC) were employed to record the morphologies and crystal structure. SIMS was examined on a Cameca IMS-5FE7 system using Cs<sup>+</sup> primary ions with a beam current of 3 nA. The analysis area of samples is 33  $\mu$ m in diameter and the raster is 16  $\mu$ m.

*Electrochemical measurements:* The electrochemical tests were carried out in coin cells (CR2032), which were assembled in an argon-filled glove box ( $O_2 \leq 0.1$  ppm,  $H_2O \leq 0.1$  ppm). The electrode was prepared by mixing active material, Super P carbon and poly(vinyl difluoride) (PVDF) in a weight ratio of 8:1:1 onto aluminum foil, followed by drying at 80 °C in vacuum for 12h. The loading mass of active material was about 1.5~2.0 mg cm<sup>-2</sup>. Sodium foil was used as negative electrode, and glass fiber was used as separator. The electrolyte was NaPF<sub>6</sub> in the propylene carbonate (PC) with 2 wt% fluoroethylene carbonate (FEC). CV was carried out at a scan rate of 0.1 mV s<sup>-1</sup> on a Solartron 1470 electrochemical work station. The charge and discharge tests and GITT were performed on a Land CT2001A battery-testing instrument. In GITT measurements, the cells were charged at 10 mA g<sup>-1</sup> for 1.5 h, followed by a rest time of 30 min. The diffusion coefficients of Na<sup>+</sup> could be calculated according to the equation:

$$D = \frac{4}{\pi\tau} \left( \frac{m_B V_M}{M_B S} \right)^2 \left( \frac{\Delta E_s}{\Delta E_\tau} \right)^2 \quad (1)$$

where  $m_B$  and  $M_B$  are the mass of active material and molecular weight, respectively.  $V_m$  is the molar volume of active material, and  $S$  is the area of electrode.  $\Delta E_s$  and  $\Delta E_\tau$  represent the change in the steady-state voltage after subtracting the IR drop and transient change in voltage. The

capacitive contributions were quantified via CV measurements at varied scan rates from 0.1 to 1.0 mV s<sup>-1</sup> between 1.5 and 4.4 V. The relationship between peak current (*i*) and scan rate (*v*) can be described as follows:

$$i = av^b \quad (1)$$

$$\log(i) = b\log(v) + \log(a) \quad (2)$$

where *b* determines the sodiation and desodiation behaviors. If *b* equals to 1, the electrochemical system is dominated by capacitance; if *b* is 0.5, the process is controlled by Na<sup>+</sup> diffusion.<sup>1,2</sup> The contributions of capacitance can be quantitatively calculated by eq 3:

$$i = k_1v + k_2v^{0.5} \quad (3)$$

where  $k_1v$  and  $k_2v^{0.5}$  represent the capacitance and Na<sup>+</sup> diffusion.

*Computational methods:* The density functional theory calculations were performed with Vienna ab initio Simulation Package (VASP)<sup>3,4</sup> with projector augmented wave potentials and Perdew-Becke-Ernzerhof (PBE) exchange-correlation.<sup>5</sup> The cutoff energy was set to 520 eV, and all the structures are fully relaxed until the remaining forces fell below 0.01 eV Å<sup>-1</sup>. Gamma-centered k-meshes with a density of 8000 k-points were sampled for the Brillouin zone. The DFT + U method<sup>6</sup> was used to address the localization of the d-orbital of Mn with U-J value of 3.9 according to previous studies.<sup>7</sup> COHP calculations were performed using the Local-

Orbital Basis Suite Towards Electronic-Structure Reconstruction (LOBSTER) code.<sup>8,9</sup> The Na<sup>+</sup> cation activation barriers were calculated using the climbing image nudged elastic band (CINEB) method<sup>10</sup> for both P'2-Na<sub>0.67</sub>Li<sub>0.05</sub>Mn<sub>0.95</sub>O<sub>2</sub> and P'2-Na<sub>0.67</sub>MnO<sub>2</sub> with one vacancy generated for Na<sup>+</sup> diffusion. Four intermediates were considered between the first and the final images of one Na<sup>+</sup> diffusion. All the atoms were allowed to relax with lattice parameters fixed during CINEB calculation.

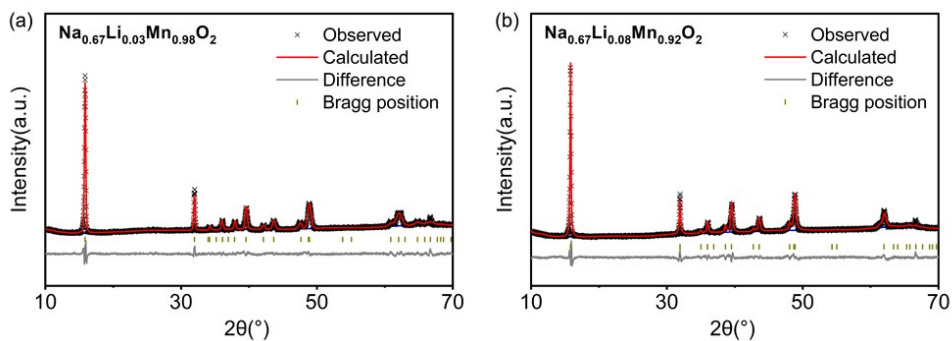

**Fig. S1** Rietveld refinement of powder XRD data for (a) P'2- $\text{Na}_{0.67}\text{Li}_{0.03}\text{Mn}_{0.97}\text{O}_2$  and (b) P'2- $\text{Na}_{0.67}\text{Li}_{0.08}\text{Mn}_{0.92}\text{O}_2$ .

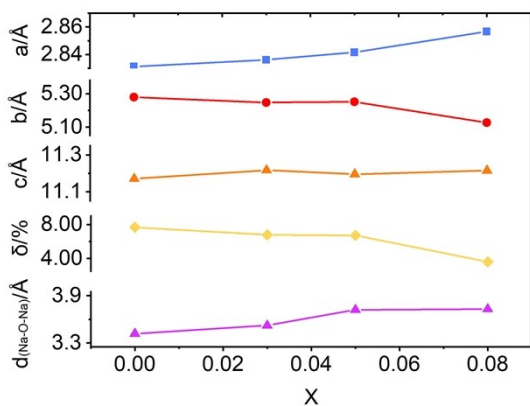

**Fig. S2** Evolution of the lattice parameters,  $\delta$  and Na interlayer space of P'2- $\text{Na}_{0.67}\text{Li}_x\text{Mn}_{1-x}\text{O}_2$ .

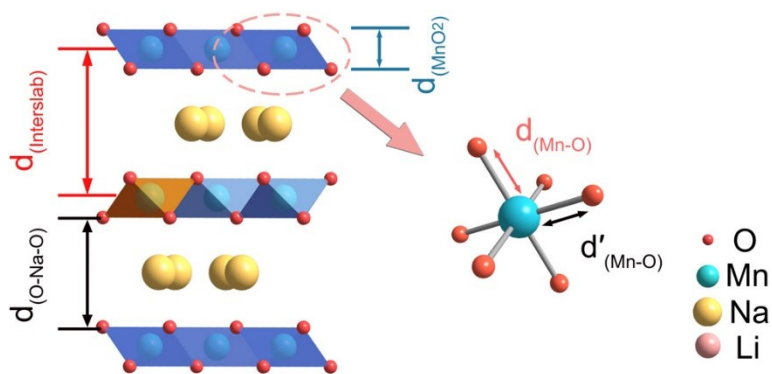

**Fig. S3** Schematic illustration of  $P'2\text{-Na}_{0.67}\text{Li}_x\text{Mn}_{1-x}\text{O}_2$ .

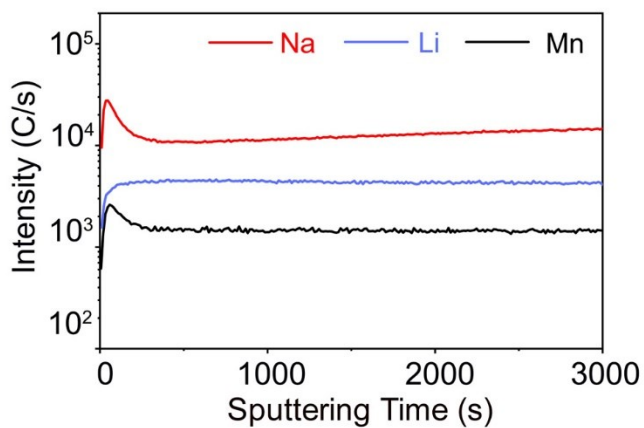

**Fig. S4** Sputter depth profiles of  $P'2\text{-Na}_{0.67}\text{Li}_{0.05}\text{Mn}_{0.95}\text{O}_2$ .

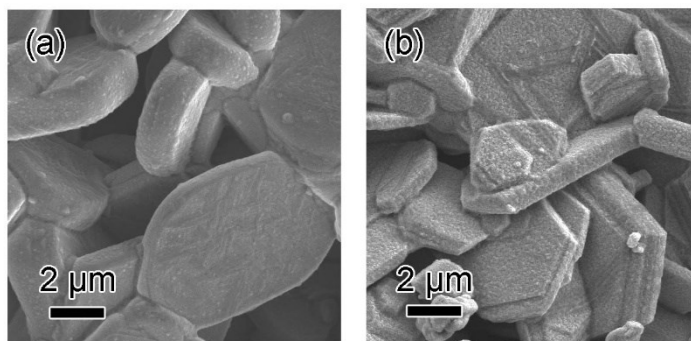

**Fig. S5** SEM images of (a) P'2-Na<sub>0.67</sub>MnO<sub>2</sub> and (b) P'2-Na<sub>0.67</sub>Mn<sub>0.95</sub>Li<sub>0.05</sub>O<sub>2</sub>.

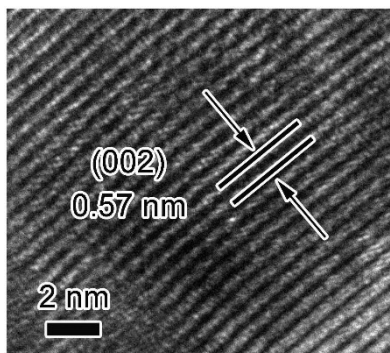

**Fig. S6** HRTEM images of P'2-Na<sub>0.67</sub>MnO<sub>2</sub>.



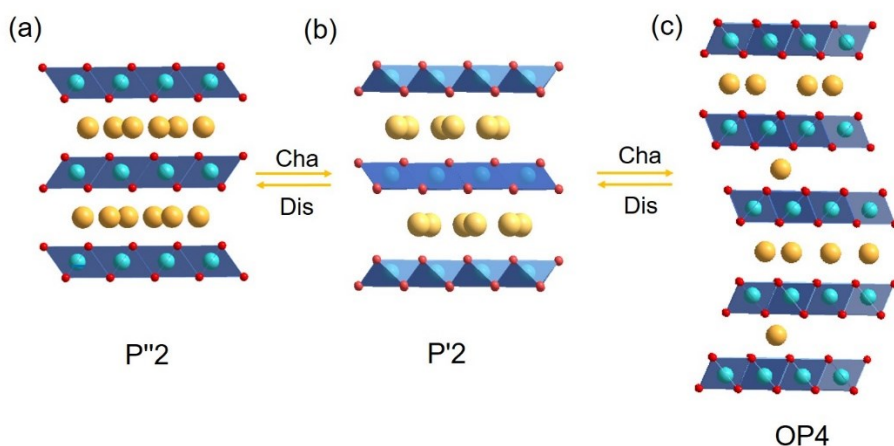

**Fig. S7** Schematic illustration of (a) P''2-, (b) P'2- and (c) OP4-type phase.

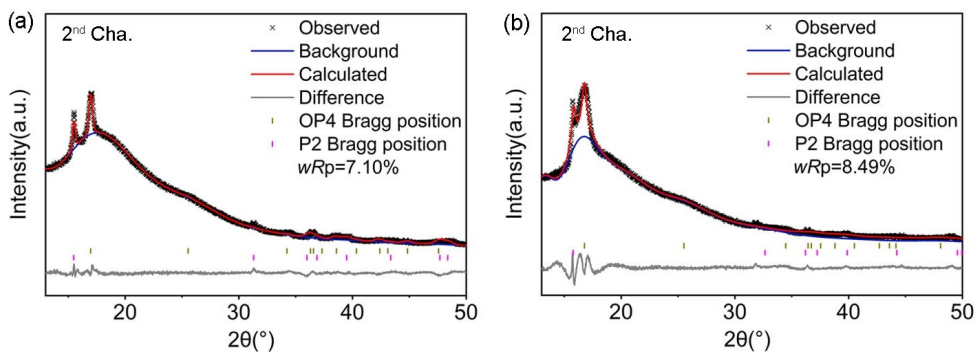

**Fig. S8** Rietveld refinement of powder XRD data for (a) P'2-Na<sub>0.67</sub>MnO<sub>2</sub> and (b) P'2-Na<sub>0.67</sub>Li<sub>0.05</sub>Mn<sub>0.95</sub>O<sub>2</sub> electrode cycled at 4.3 V during second charge.

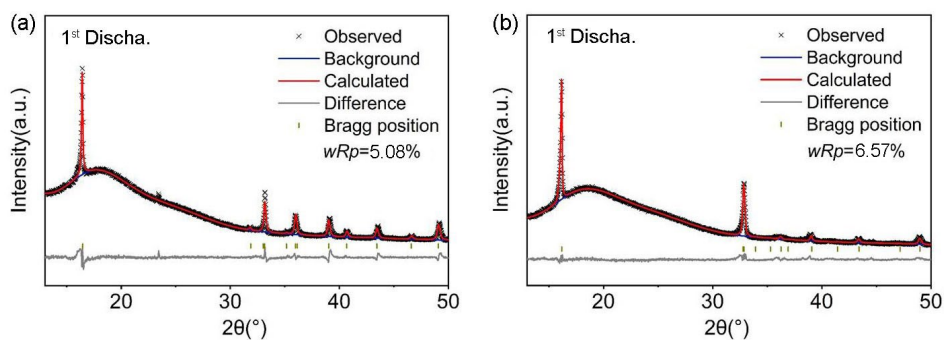

**Fig. S9** Rietveld refinement of powder XRD data for (a) P'2-Na<sub>0.67</sub>MnO<sub>2</sub> and (b) P'2-Na<sub>0.67</sub>Li<sub>0.05</sub>Mn<sub>0.95</sub>O<sub>2</sub> electrode cycled at 1.8 V during first discharge.

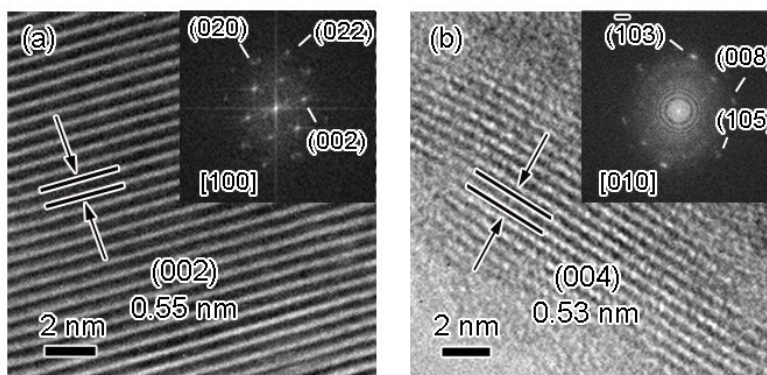

**Fig. S10** HRTEM and FFT images of P'2-Na<sub>0.67</sub>Li<sub>0.05</sub>Mn<sub>0.95</sub>O<sub>2</sub> electrodes: (a) fully discharged to 1.8 V and (b) fully charged to 4.3 V.

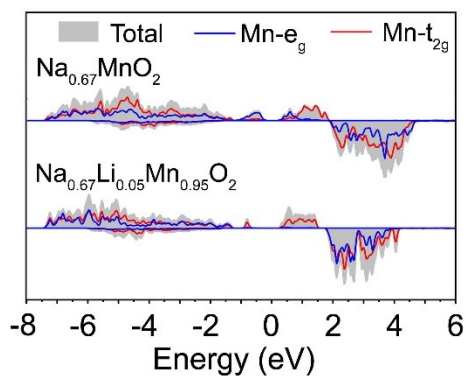

**Fig. S11** Electronic density of states projected on Mn ion.

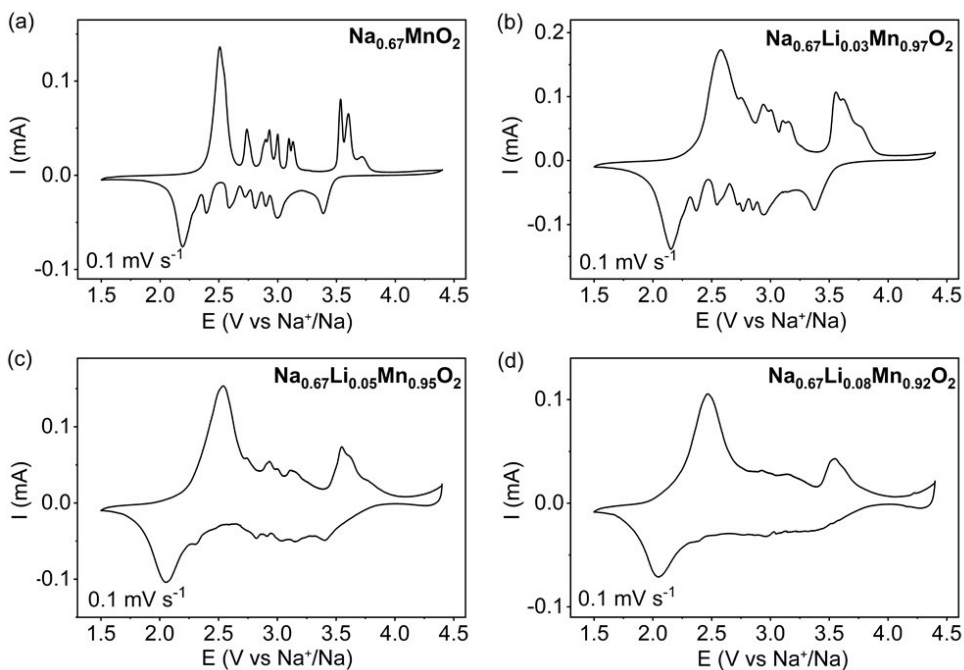

**Fig. S12** Cyclic voltammograms of (a)  $\text{Na}_{0.67}\text{MnO}_2$ , (b)  $\text{Na}_{0.67}\text{Li}_{0.03}\text{Mn}_{0.97}\text{O}_2$ , (c)  $\text{Na}_{0.67}\text{Li}_{0.05}\text{Mn}_{0.95}\text{O}_2$  and (d)  $\text{Na}_{0.67}\text{Li}_{0.08}\text{Mn}_{0.92}\text{O}_2$  electrodes measured at a scan rate of  $0.1 \text{ mV s}^{-1}$  within 1.5-4.4 V.

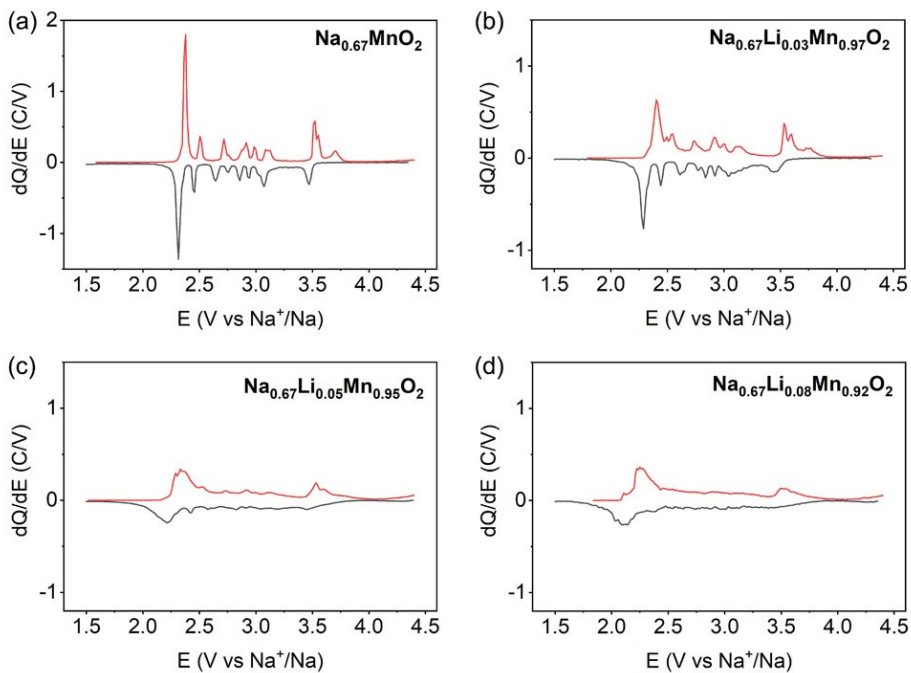

**Fig. S13**  $dQ/dE$  curves of first discharge (bottom side) and second charge (upper side) of (a)  $\text{Na}_{0.67}\text{MnO}_2$ , (b)  $\text{Na}_{0.67}\text{Li}_{0.03}\text{Mn}_{0.97}\text{O}_2$ , (c)  $\text{Na}_{0.67}\text{Li}_{0.05}\text{Mn}_{0.95}\text{O}_2$  and (d)  $\text{Na}_{0.67}\text{Li}_{0.08}\text{Mn}_{0.92}\text{O}_2$  electrodes measured within 1.5-4.4 V.

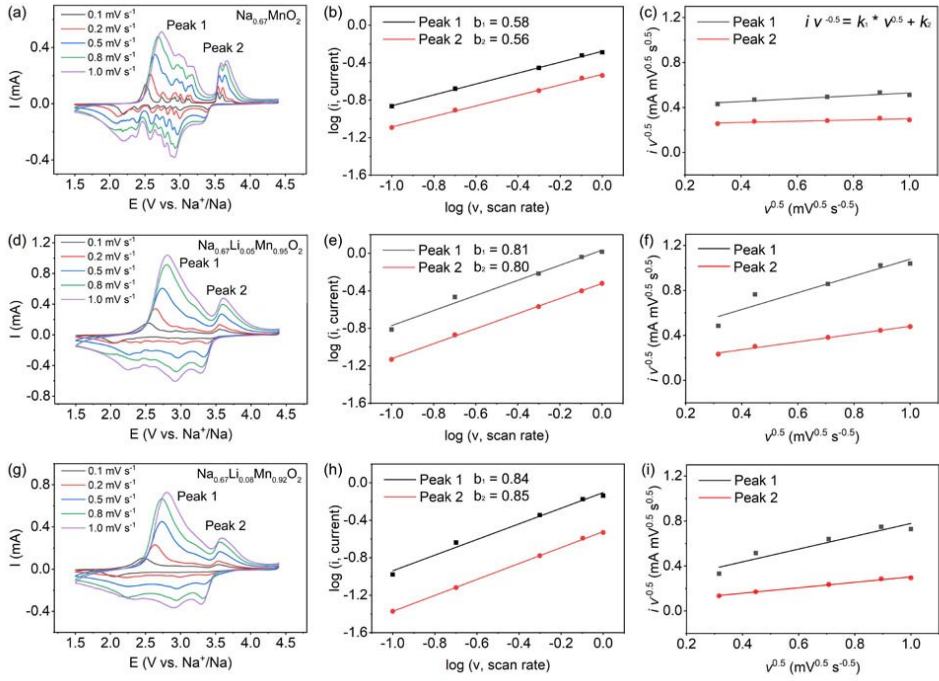

**Fig. S14.** CV profiles at different scan rates for (a)  $\text{Na}_{0.67}\text{MnO}_2$ , (d)  $\text{Na}_{0.67}\text{Li}_{0.05}\text{Mn}_{0.95}\text{O}_2$  and (g)  $\text{Na}_{0.67}\text{Li}_{0.08}\text{Mn}_{0.92}\text{O}_2$ . Linear relationship of  $\log(i)$  and  $\log(v)$  of peak 1, 2 for (b)  $\text{Na}_{0.67}\text{MnO}_2$ , (e)  $\text{Na}_{0.67}\text{Li}_{0.05}\text{Mn}_{0.95}\text{O}_2$  and (h)  $\text{Na}_{0.67}\text{Li}_{0.08}\text{Mn}_{0.92}\text{O}_2$ . Plots of  $iv^{-0.5}$  against  $v^{0.5}$  of peaks 1, 2 for (c)  $\text{Na}_{0.67}\text{MnO}_2$ , (f)  $\text{Na}_{0.67}\text{Li}_{0.05}\text{Mn}_{0.95}\text{O}_2$  and (i)  $\text{Na}_{0.67}\text{Li}_{0.08}\text{Mn}_{0.92}\text{O}_2$ . The constants  $k_1$  and  $k_2$  can be used to evaluate the capacitive and  $\text{Na}^+$  ion diffusion contribution, respectively.

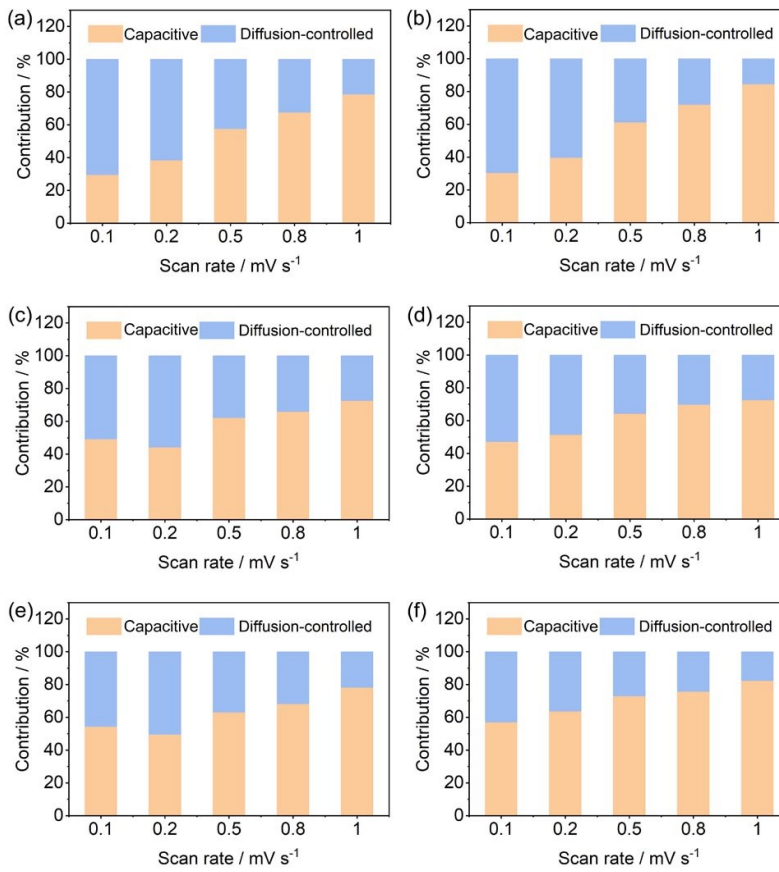

**Fig. S15.** Ratio of the capacitive and diffusion-controlled capacities at different scan rate for (a) peak 1 and (b) peak 2 of  $\text{Na}_{0.67}\text{MnO}_2$ ; (c) peak 1 and (d) peak 2 of  $\text{Na}_{0.67}\text{Li}_{0.05}\text{Mn}_{0.95}\text{O}_2$ ; (e) peak 1 and (f) peak 2 of  $\text{Na}_{0.67}\text{Li}_{0.08}\text{Mn}_{0.92}\text{O}_2$ .

**Table S1.** Rietveld refinement results for P'2-Na<sub>0.67</sub>MnO<sub>2</sub>.

| Sample                              | Atom            | Site | x | y      | z     | g     | B <sub>iso</sub> |
|-------------------------------------|-----------------|------|---|--------|-------|-------|------------------|
| Na <sub>0.67</sub> MnO <sub>2</sub> | Na <sub>f</sub> | 4c   | 0 | -0.072 | 0.250 | 0.184 | 1.14             |
|                                     | Na <sub>e</sub> | 4c   | 0 | 0.312  | 0.250 | 0.475 | 2.40             |
|                                     | Mn              | 4a   | 0 | 0      | 0     | 1     | 0.53             |
|                                     | O               | 8f   | 0 | 0.652  | 0.097 | 1     | 4.52             |

Space group: *Cmcm*, a = 2.831 Å, b = 5.280 Å, c = 11.171 Å,  $\alpha = \beta = \gamma = 90^\circ$ , Vol = 166.993 Å<sup>3</sup>, (Z = 4),  $R_p = 2.66\%$ ,  $R_{wp} = 4.07\%$ ,  $\chi^2 = 6.554$ . g: occupancy. x, y, z: atomic coordinate.

**Table S2.** Rietveld refinement results for P'2-Na<sub>0.67</sub>Li<sub>0.03</sub>Mn<sub>0.97</sub>O<sub>2</sub>.

| Sample                                                                  | Atom            | Site | x | y      | z     | g     | B <sub>iso</sub> |
|-------------------------------------------------------------------------|-----------------|------|---|--------|-------|-------|------------------|
| Na <sub>0.67</sub> Li <sub>0.03</sub> Mn <sub>0.97</sub> O <sub>2</sub> | Na <sub>f</sub> | 4c   | 0 | -0.069 | 0.250 | 0.212 | 1.16             |
|                                                                         | Na <sub>e</sub> | 4c   | 0 | 0.321  | 0.250 | 0.448 | 0.32             |
|                                                                         | Mn              | 4a   | 0 | 0      | 0     | 0.971 | 0.34             |
|                                                                         | Li              | 4a   | 0 | 0      | 0     | 0.029 | 0.34             |
|                                                                         | O               | 8f   | 0 | 0.662  | 0.093 | 1     | 5.00             |

Space group: *Cmcm*, a = 2.837 Å, b = 5.248 Å, c = 11.217 Å,  $\alpha = \beta = \gamma = 90^\circ$ , Vol = 166.995 Å<sup>3</sup>, (Z = 4),  $R_p = 2.05\%$ ,  $R_{wp} = 2.97\%$ ,  $\chi^2 = 3.168$ . g: occupancy. x, y, z: atomic coordinate.

**Table S3.** Rietveld refinement results for P'2-Na<sub>0.67</sub>Li<sub>0.05</sub>Mn<sub>0.95</sub>O<sub>2</sub>.

| Sample                                                                  | Atom            | Site | x | y      | z      | g     | B <sub>iso</sub> |
|-------------------------------------------------------------------------|-----------------|------|---|--------|--------|-------|------------------|
| Na <sub>0.67</sub> Li <sub>0.05</sub> Mn <sub>0.95</sub> O <sub>2</sub> | Na <sub>f</sub> | 4c   | 0 | -0.089 | 0.250  | 0.230 | 0.78             |
|                                                                         | Na <sub>e</sub> | 4c   | 0 | 0.318  | 0.250  | 0.425 | 0.50             |
|                                                                         | Mn              | 4a   | 0 | 0      | 0      | 0.945 | 0.42             |
|                                                                         | Li              | 4a   | 0 | 0      | 0      | 0.055 | 0.42             |
|                                                                         | O               | 8f   | 0 | 0.668  | 0.0838 | 1     | 3.67             |

Space group: *Cmcm*,  $a = 2.841 \text{ \AA}$ ,  $b = 5.252 \text{ \AA}$ ,  $c = 11.195 \text{ \AA}$ ,  $\alpha = \beta = \gamma = 90^\circ$ ,  $\text{Vol} = 167.047 \text{ \AA}^3$ , ( $Z = 4$ ),  $R_p = 2.23\%$ ,  $R_{wp} = 3.13\%$ ,  $\chi^2 = 3.725$ . g: occupancy. x, y, z: atomic coordinate.

**Table S4.** Rietveld refinement results for P'2-Na<sub>0.67</sub>Li<sub>0.08</sub>Mn<sub>0.92</sub>O<sub>2</sub>.

| Sample                                                                  | Atom            | Site | x | y      | z      | g     | B <sub>iso</sub> |
|-------------------------------------------------------------------------|-----------------|------|---|--------|--------|-------|------------------|
| Na <sub>0.67</sub> Li <sub>0.08</sub> Mn <sub>0.92</sub> O <sub>2</sub> | Na <sub>f</sub> | 4c   | 0 | -0.092 | 0.250  | 0.252 | 0.60             |
|                                                                         | Na <sub>e</sub> | 4c   | 0 | 0.325  | 0.250  | 0.438 | 0.65             |
|                                                                         | Mn              | 4a   | 0 | 0      | 0      | 0.920 | 0.46             |
|                                                                         | Li              | 4a   | 0 | 0      | 0      | 0.080 | 0.46             |
|                                                                         | O               | 8f   | 0 | 0.667  | 0.0837 | 1     | 3.83             |

Space group: *Cmcm*,  $a = 2.856 \text{ \AA}$ ,  $b = 5.128 \text{ \AA}$ ,  $c = 11.216 \text{ \AA}$ ,  $\alpha = \beta = \gamma = 90^\circ$ ,  $\text{Vol} = 164.270 \text{ \AA}^3$ , ( $Z = 4$ ),  $R_p = 2.30\%$ ,  $R_{wp} = 3.37\%$ ,  $\chi^2 = 4.040$ . g: occupancy. x, y, z: atomic coordinate.

**Table S5.** Lengths of Mn-O, MnO<sub>2</sub> layers thickness, Na interlayer spacing and interslab distance for P'2-Na<sub>0.67</sub>MnO<sub>2</sub> and P'2-Na<sub>0.67</sub>Li<sub>0.05</sub>Mn<sub>0.95</sub>O<sub>2</sub>.



| Sample                                                                  | Mn-O<br>(Å) | Mn-O'<br>(Å) | MnO <sub>2</sub><br>(Å) | O-Na-O<br>(Å) | Interslab<br>distance<br>(Å) |
|-------------------------------------------------------------------------|-------------|--------------|-------------------------|---------------|------------------------------|
| Na <sub>0.67</sub> MnO <sub>2</sub>                                     | 2.133       | 1.955        | 2.187                   | 3.418         | 5.586                        |
| Na <sub>0.67</sub> Li <sub>0.05</sub> Mn <sub>0.95</sub> O <sub>2</sub> | 1.980       | 1.917        | 1.877                   | 3.721         | 5.598                        |

**Table S6.** ICP-OES results for P'2-Na<sub>0.67</sub>MnO<sub>2</sub> and P'2-Na<sub>0.67</sub>Li<sub>0.05</sub>Mn<sub>0.95</sub>O<sub>2</sub>.

| Sample                                                                  | Na    | Li     | Mn    |
|-------------------------------------------------------------------------|-------|--------|-------|
| Na <sub>0.67</sub> MnO <sub>2</sub>                                     | 0.659 | 0      | 1     |
| Na <sub>0.67</sub> Li <sub>0.05</sub> Mn <sub>0.95</sub> O <sub>2</sub> | 0.655 | 0.0557 | 0.944 |

**Table S7.** Structural parameters of OP4-type phase electrode cycled at 4.3 V during 2nd charge based on Rietveld refinement.

| Sample                                                               | a     | b     | c      | d <sub>(Mn-O)</sub> |
|----------------------------------------------------------------------|-------|-------|--------|---------------------|
| Na <sub>x</sub> MnO <sub>2</sub>                                     | 2.866 | 2.866 | 21.058 | 1.944               |
| Na <sub>x</sub> Li <sub>0.05</sub> Mn <sub>0.95</sub> O <sub>2</sub> | 2.840 | 2.840 | 20.820 | 1.928               |

Na<sub>x</sub>MnO<sub>2</sub>. Space group:  $P63/m m c$ ,  $\alpha = \beta = 90^\circ$ ,  $\gamma = 120^\circ$ , Vol = 149.82 Å<sup>3</sup>,  $R_p = 2.40\%$ ,  $R_{wp} = 7.10\%$ ; Na<sub>x</sub>Li<sub>0.05</sub>Mn<sub>0.95</sub>O<sub>2</sub>. Space group:  $P63/m m c$ ,  $\alpha = \beta = 90^\circ$ ,  $\gamma = 120^\circ$ , Vol = 145.38 Å<sup>3</sup>,  $R_p = 3.61\%$ ,  $R_{wp} = 8.49\%$ .

**Table S8.** Structural parameters of P''2-type phase electrode cycled at 1.8 V during 1st discharge based on Rietveld refinement.

| Sample                                                  | a     | b     | c      | V       | $\delta$ | $d_{(\text{Mn-O})}$ | $d'_{(\text{Mn-O})}$ |
|---------------------------------------------------------|-------|-------|--------|---------|----------|---------------------|----------------------|
| $\text{Na}_x\text{MnO}$                                 | 2.863 | 5.622 | 10.802 | 173.849 | 13.37%   | 2.305               | 1.890                |
| $\text{Na}_x\text{Li}_{0.05}\text{Mn}_{0.95}\text{O}_2$ | 2.865 | 5.424 | 10.887 | 169.179 | 9.30%    | 2.230               | 1.854                |

$\text{Na}_x\text{MnO}_2$ . Space group: *Cmcm*,  $\alpha = \beta = \gamma = 90^\circ$ , Vol = 173.849  $\text{\AA}^3$ ,  $R_p = 2.51\%$ ,  $R_{wp} = 5.08\%$ ;  $\text{Na}_x\text{Li}_{0.05}\text{Mn}_{0.95}\text{O}_2$ . Space group: *Cmcm*,  $\alpha = \beta = \gamma = 90^\circ$ , Vol = 169.179  $\text{\AA}^3$ ,  $R_p = 2.88\%$ ,  $R_{wp} = 6.57\%$ .

**Table S9.** Summary of COHP analysis of Mn sites in P'2- $\text{Na}_{0.67}\text{MnO}_2$  and P'2- $\text{Na}_{0.67}\text{Li}_{0.05}\text{Mn}_{0.95}\text{O}_2$ .

| -COHP(avg)                                                   | Mn-O21 | Mn-O22 | Mn-O25 | Mn-O26 | Mn-O29 | Mn-O35 | Sum.  |
|--------------------------------------------------------------|--------|--------|--------|--------|--------|--------|-------|
| $\text{Na}_{0.67}\text{MnO}$                                 | 1.328  | 1.320  | 0.520  | 0.484  | 1.177  | 1.103  | 5.934 |
| $\text{Na}_{0.67}\text{Li}_{0.05}\text{Mn}_{0.95}\text{O}_2$ | 1.408  | 1.460  | 1.266  | 1.190  | 1.131  | 1.217  | 7.673 |

## References

1. L. Wang, C. Wang, N. Zhang, F. Li, F. Cheng and J. Chen, *ACS Energy Lett.* 2017, **2**, 256.
2. Y. Xiao, Y.-F. Zhu, H.-R. Yao, P.-F. Wang, X.-D. Zhang, H. Li, X. Yang, L. Gu, Y.-C. Li, T. Wang, Y.-X. Yin, X.-D. Guo, B.-H. Zhang, Y.-G. Guo, *Adv. Energy Mater.* 2019, **19**, 1803978.
3. G. Kresse, *Phys. Rev. B.* 1993, **47**, 558.
4. G. Kresse and J. Furthmüller, *Phys. Rev. B.* 1996, **54**, 11169.
5. J. P. Perdew and Y. Wang, *Phys. Rev. B.* 1992, **45**, 13244.
6. S. L. Dudarev, G. A. Botton, S. Y. Savrasov, C. J. Humphreys and A. P. Sutton, *Phys. Rev. B.* 1998, **57**, 1505.

7. Y. J. Park, J. U. Choi, J. H. Jo, C.-H. Jo, J. Kim and S.-T. Myung, *Adv. Funct. Mater.* 2019, **29**, 1901912.
8. R. Dronskowski and P. E. Bloechl, *J. Phys. Chem.* 1993, **97**, 8617.
9. S. Maintz, V. L. Deringer, A. L. Tchougréeff and R. Dronskowski, *J. Comput. Chem.* 2016, **37**, 1030.
10. G. Henkelman, B. P. Uberuaga and H. Jónsson, *J. Chem. Phys.* 2000, **113**, 9901.
